# Supplementary figures and images for: Phylogenetic and Phylodynamic Analyses of Soybean Mosaic Virus Using 305 Coat Protein Gene Sequences
Source: MDPI journal article supplement (doi:10.3390/plants11233256), 2022-11-27

Region A

Region C

Region B

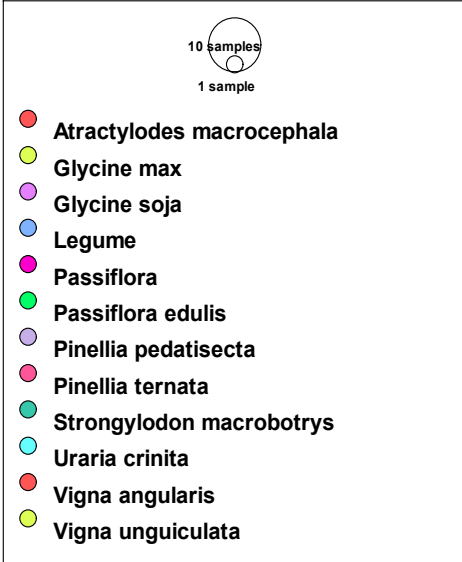

Supplement: s1 [file s1]

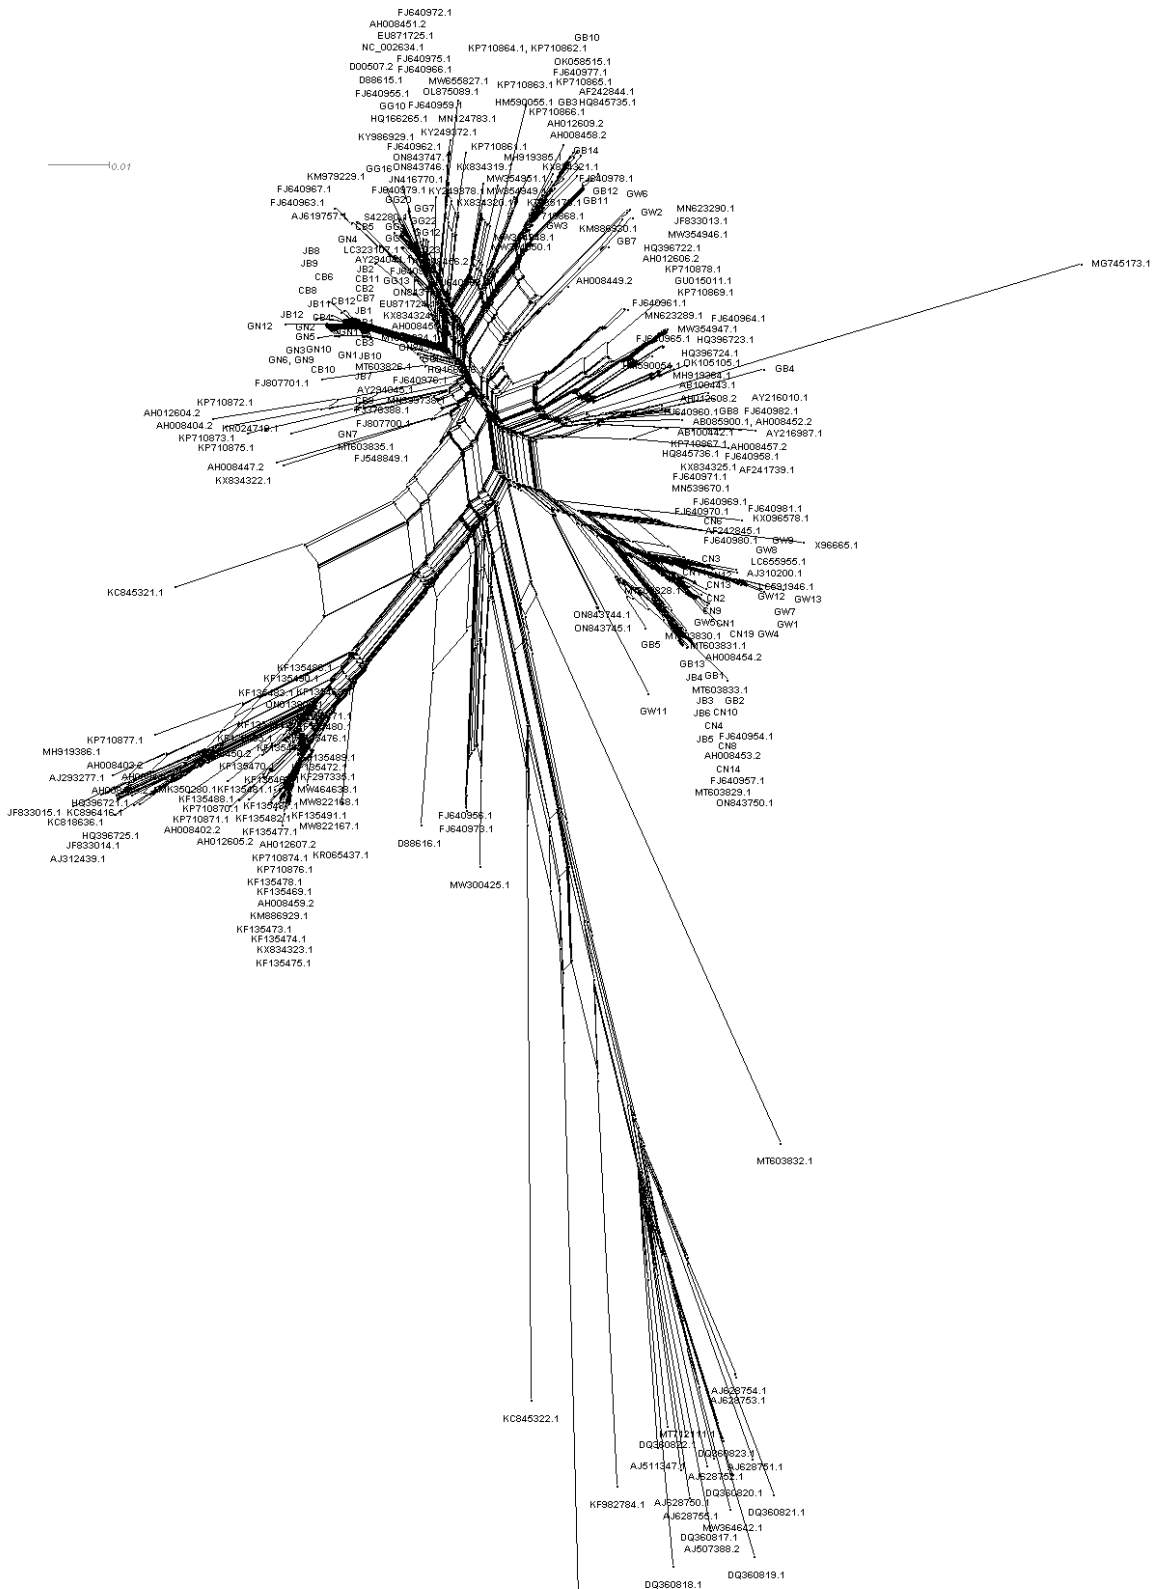

Supplement: s1 [file s1]

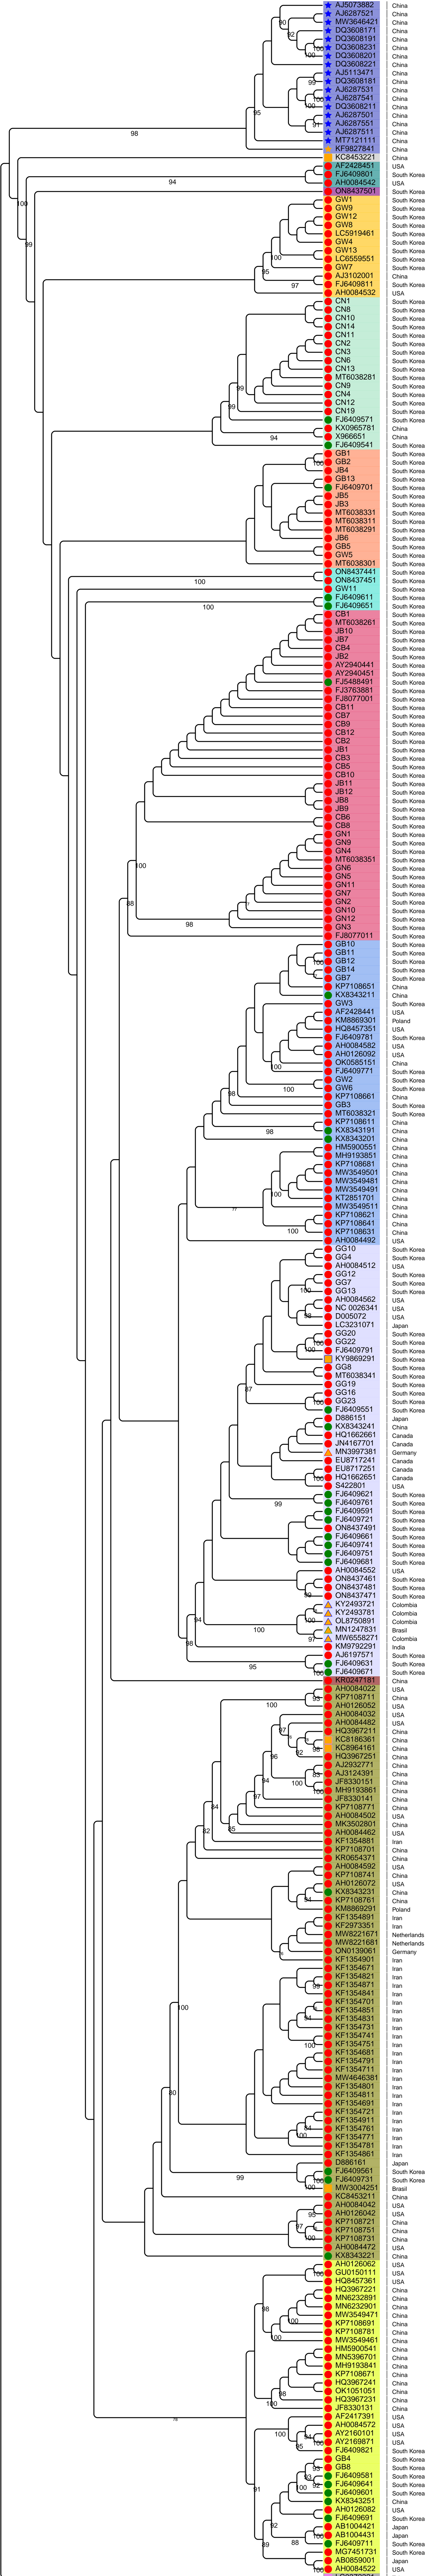

Supplement: s1 [file s1]
